# Supplementary material for: Influenza A Virus (H1N1) Infection Induces Microglial Activation and Temporal Dysbalance in Glutamatergic Synaptic Transmission
Source: PubMed Central journal article supplement (PMC8546584; doi:10.1128/mbio.01776-21), 2021-10-26

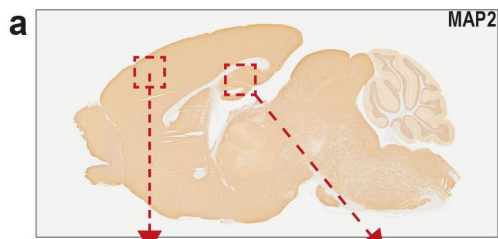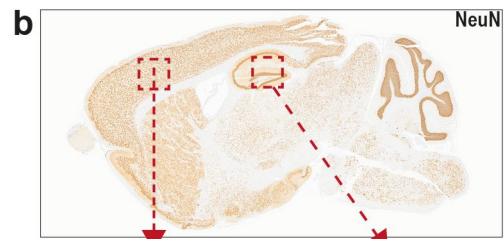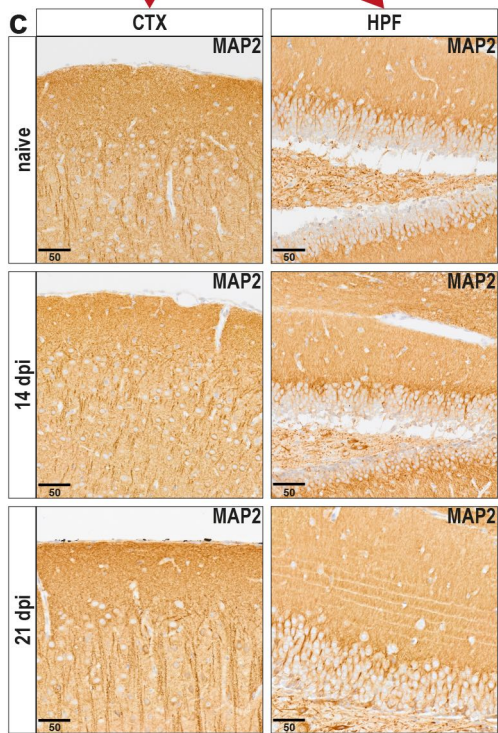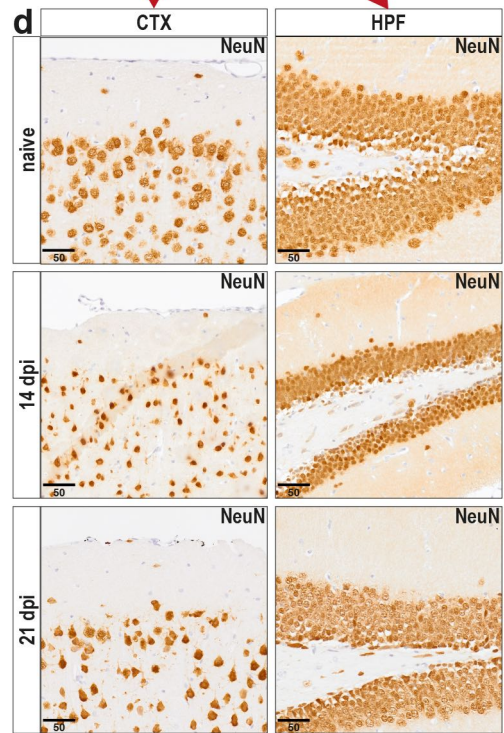

Supplement: mbio.01776-21-sf002.pdf [file mbio.01776-21-sf002.pdf]
